# Supplementary material for: Enhanced photocatalytic activity of brown H4Nb6O17/g-C3N4 composite for visible-light driven H2O2 production
Source: Royal Society of Chemistry journal article supplement (doi:10.1039/d1ya00038a), 2022-01-01
Supplement: d1ya00038a1.pdf [file d1ya00038a1.pdf]

Supporting information for:

**Enhanced photocatalytic activity of novel brown  $\text{H}_4\text{Nb}_6\text{O}_{17}/\text{g-C}_3\text{N}_4$  composite for visible-light driven  $\text{H}_2\text{O}_2$  production**

Luona Zhang<sup>a</sup>, Shiqi Zhao<sup>a</sup>, Xiaorong Cheng<sup>b</sup>, Zijie Liu<sup>a</sup>, Ruochen Liu<sup>a</sup>, Graham Dawson<sup>a\*</sup>

<sup>a</sup>Department of Chemistry, Xi'an Jiaotong Liverpool University, Suzhou, Jiangsu, 215123, P. R. China

<sup>b</sup>Suzhou Vocational Institute of Industrial Technology, Suzhou, Jiangsu, 215104, P. R. China

\* Corresponding author: [graham.dawson@xjtlu.edu.cn](mailto:graham.dawson@xjtlu.edu.cn)

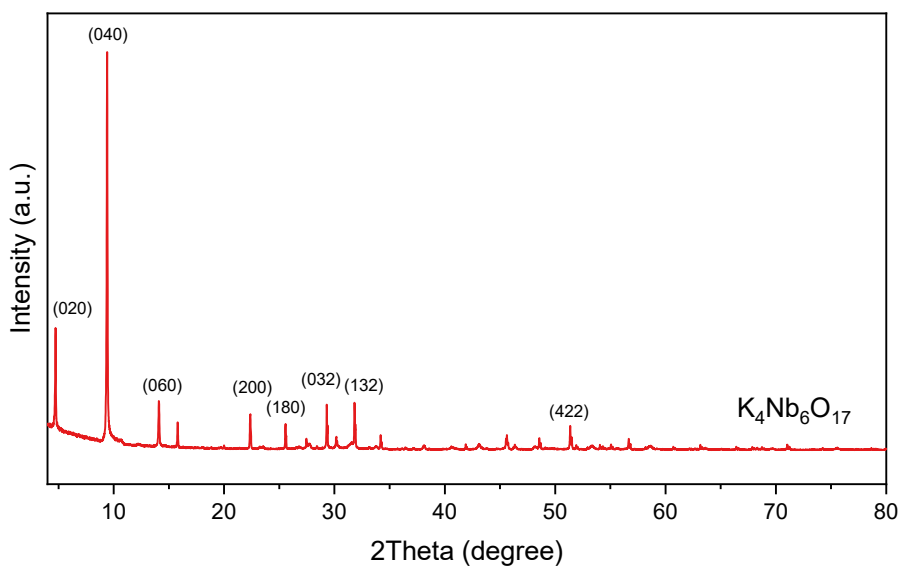

Figure S1. XRD pattern of as prepared  $\text{K}_4\text{Nb}_6\text{O}_{17}$  indexed to JCPDS, No. 76-0977.

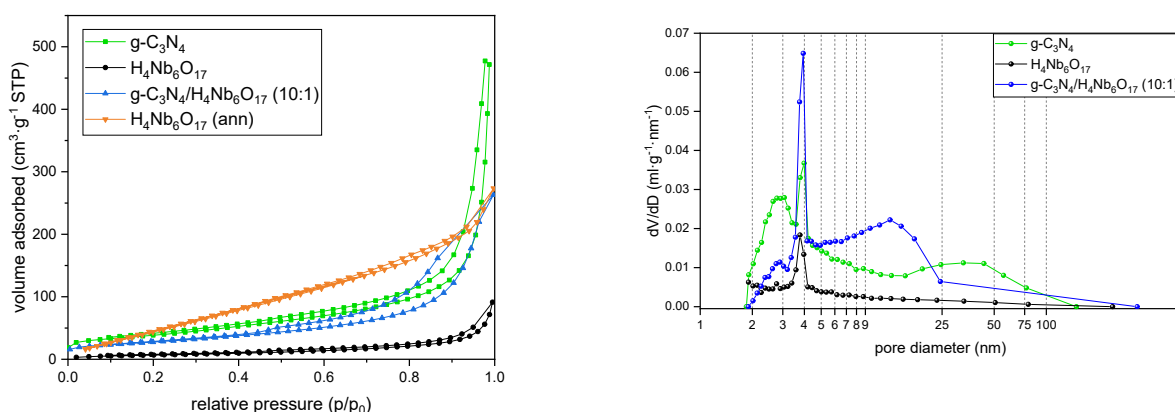

Figure S2. N<sub>2</sub> adsorption-desorption isotherms and BJH pore size distribution of the samples.

Table 1: BET surface areas and pore volume of the samples.

| Sample                                                                                 | S <sub>BET</sub> (m <sup>2</sup> /g) | Pore volume (cm <sup>3</sup> /g) |
|----------------------------------------------------------------------------------------|--------------------------------------|----------------------------------|
| H <sub>4</sub> Nb <sub>6</sub> O <sub>17</sub>                                         | 26.0                                 | 0.15                             |
| g-C <sub>3</sub> N <sub>4</sub>                                                        | 139.0                                | 0.89                             |
| H <sub>4</sub> Nb <sub>6</sub> O <sub>17</sub> (ann.)                                  | 104                                  | 0.43                             |
| g-C <sub>3</sub> N <sub>4</sub> /H <sub>4</sub> Nb <sub>6</sub> O <sub>17</sub> (10:1) | 100.4                                | 0.44                             |

Figure S3. Zeta potential measurement for H<sub>4</sub>Nb<sub>6</sub>O<sub>17</sub> (ann) and g-C<sub>3</sub>N<sub>4</sub>.

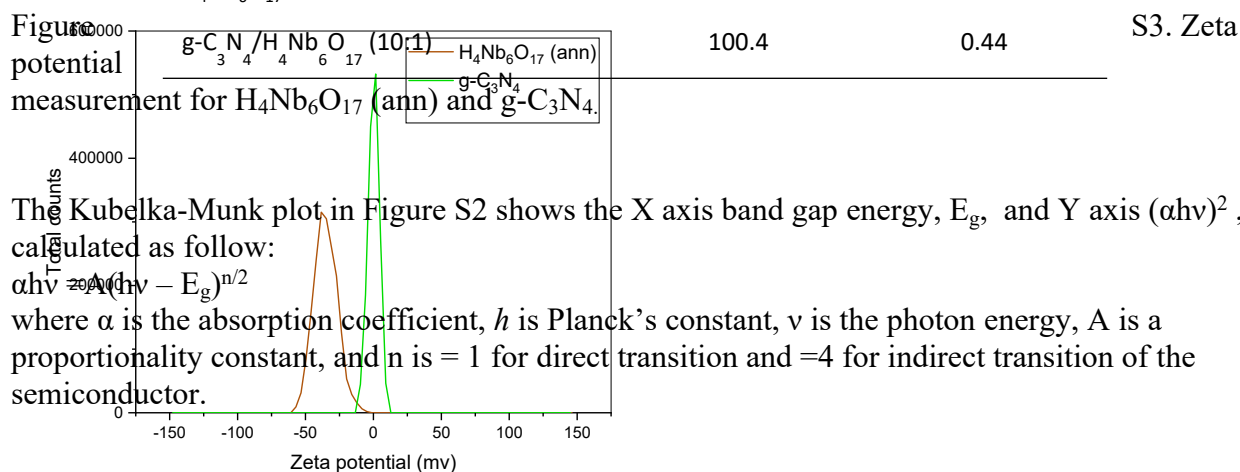

The Kubelka-Munk plot in Figure S2 shows the X axis band gap energy,  $E_g$ , and Y axis  $(\alpha h\nu)^2$ , calculated as follow:  

$$\alpha h\nu = A(h\nu - E_g)^{n/2}$$
 where  $\alpha$  is the absorption coefficient,  $h$  is Planck's constant,  $\nu$  is the photon energy,  $A$  is a proportionality constant, and  $n$  is = 1 for direct transition and =4 for indirect transition of the semiconductor.

S3. Zeta

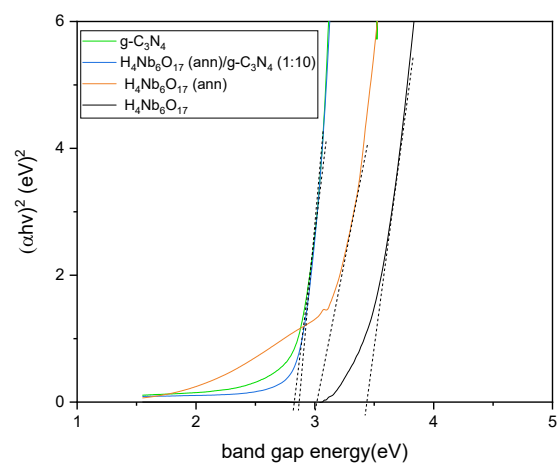

Figure S4. Kubelka-Munk plot of the samples calculated from the UV-vis data shown in Figure 4.

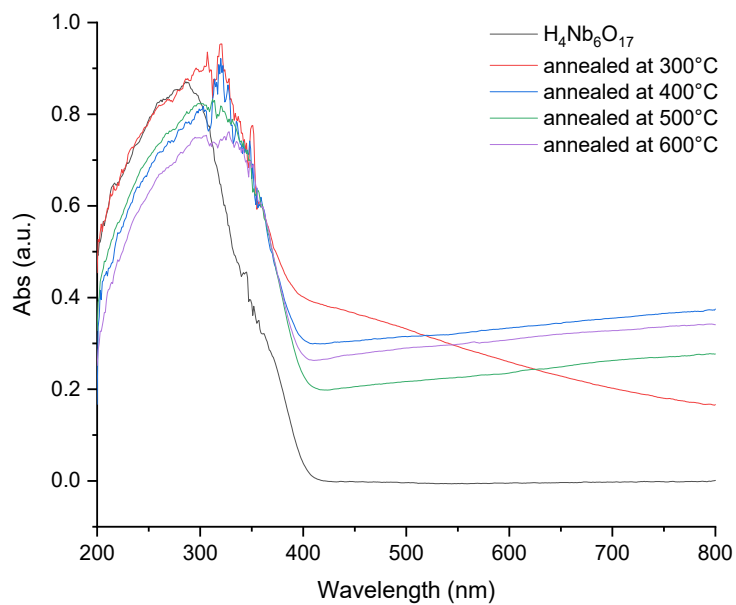

Figure S5. UV-vis spectra of H<sub>4</sub>Nb<sub>6</sub>O<sub>17</sub> annealed at different temperatures

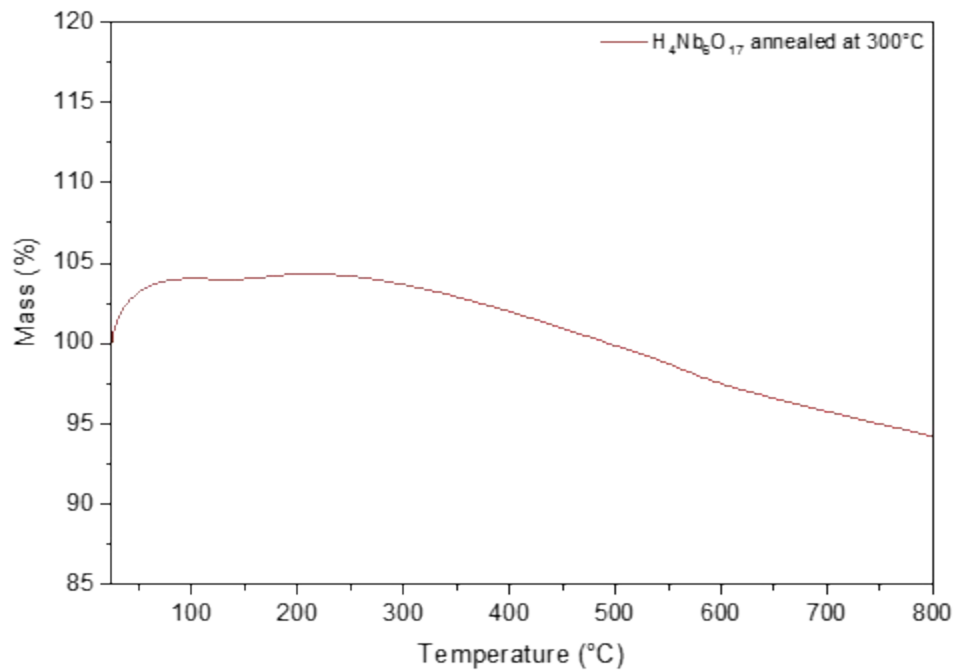

Figure S6. TGA of  $H_4Nb_6O_{17}$  (ann)

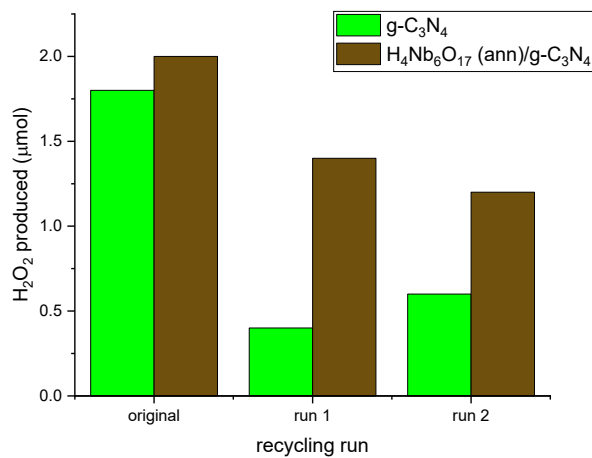

Figure S7. . Recycling ability for  $H_2O_2$  production for  $g-C_3N_4$  and  $H_4Nb_6O_{17}$  (ann)/  $g-C_3N_4$  composite

Sample shows a mass loss between 250 and 570  $^\circ C$  of  $\sim 7\%$ , which can be ascribed to loss of incorporated organic material. Above this inflexion point decomposition is observed.

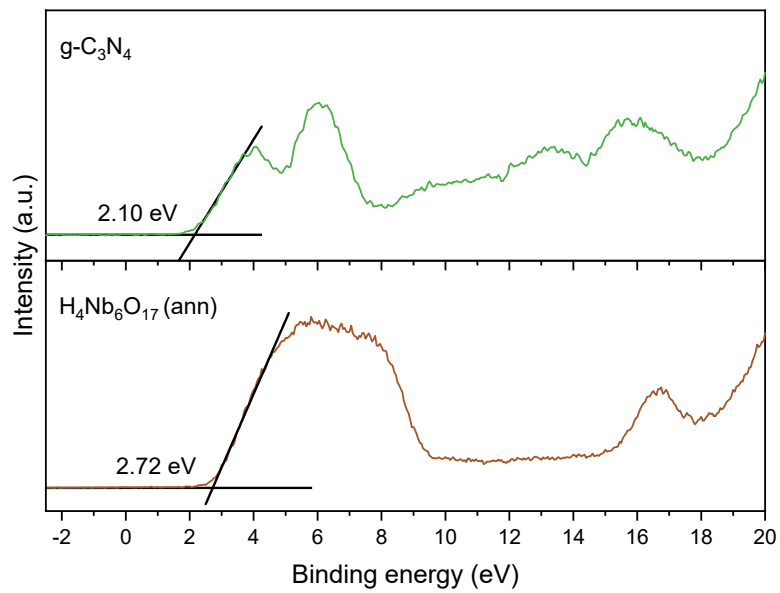

Figure S8. VB-XPS spectra of  $g\text{-C}_3\text{N}_4$  and the annealed  $\text{H}_4\text{Nb}_6\text{O}_{17}$ .

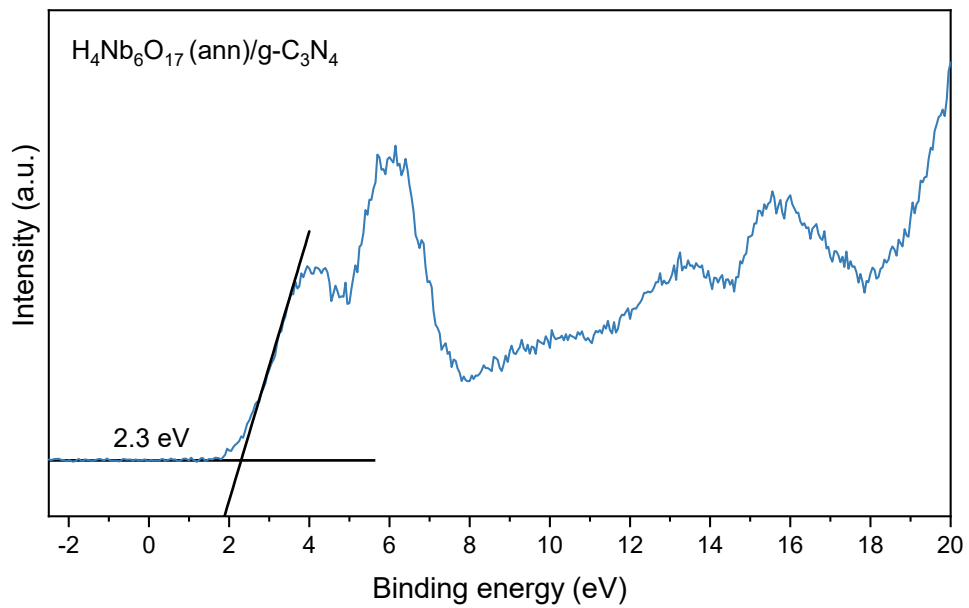

Figure S9. VB-XPS spectra of VB-XPS of  $\text{H}_4\text{Nb}_6\text{O}_{17}$  (ann)/  $g\text{-C}_3\text{N}_4$ .

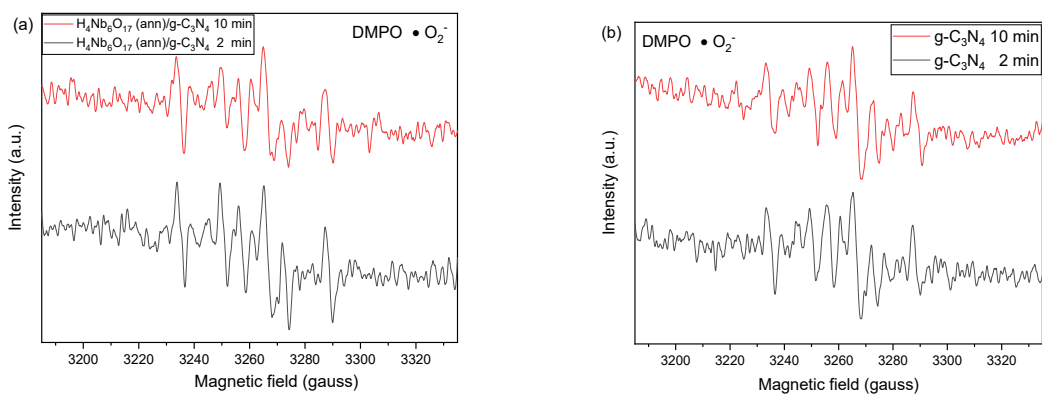

Figure S10. EPR spectra of  $\cdot\text{O}_2^-$  radicals with irradiation for 2 min in methanol.

## ESI Section 2: Composite optimization

### XRD:

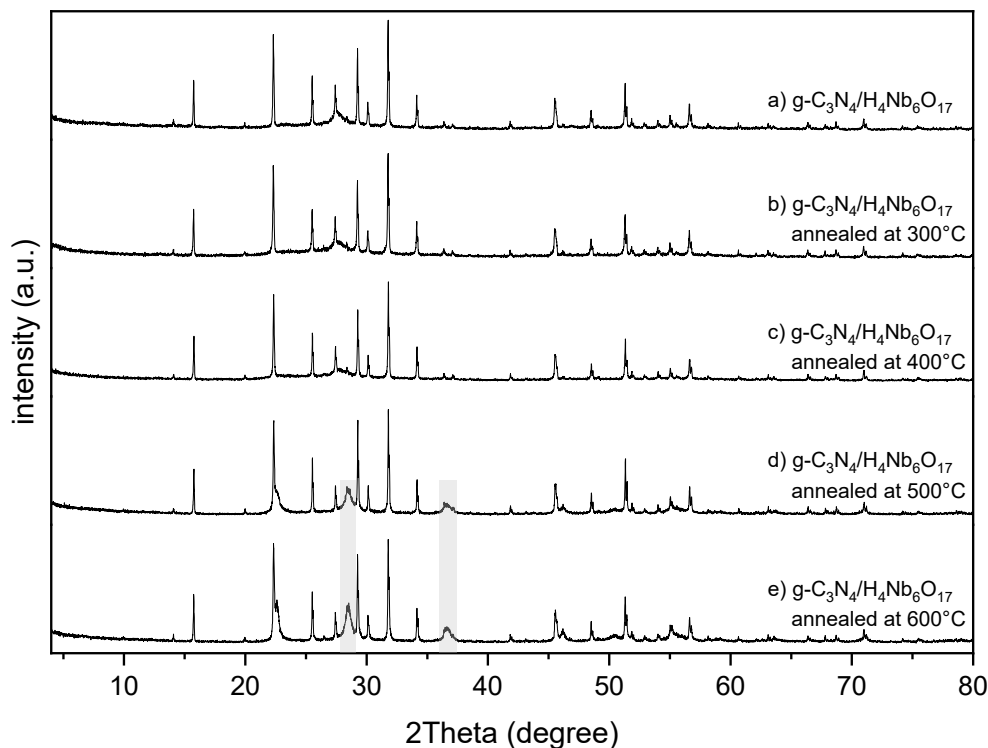

Figure S11. XRD patterns of  $\text{g-C}_3\text{N}_4/\text{H}_4\text{Nb}_6\text{O}_{17}$  composites (a) before and after annealing at (b) 300°C, (c) 400°C, (d) 500°C and (e) 600°C.

When surveying the diffraction pattern of  $\text{g-C}_3\text{N}_4/\text{H}_4\text{Nb}_6\text{O}_{17}$  (1:2) composite, it was found that the diffraction peaks were mostly ascribed to the crystalline structure of exfoliated  $\text{H}_4\text{Nb}_6\text{O}_{17}$

(Figure S11 a). The failure in observing the characteristic peaks of  $g\text{-C}_3\text{N}_4$  can be justified by the relatively lower degree of crystallinity and lower content of  $g\text{-C}_3\text{N}_4$  in the mass ratio under study. However, crystallographic analyses proved to be useful in investigating the impact of the annealing treatment, carried out to potentially induce useful chemo-physical alterations (Figure S11 b-e). The diffraction peaks of the composite were preserved in the annealed samples, indicating that annealing at temperatures in the range between  $300^\circ\text{C}$  to  $600^\circ\text{C}$  did not destroy the  $g\text{-C}_3\text{N}_4/\text{H}_4\text{Nb}_6\text{O}_{17}$  heterostructure. Moreover, higher annealing temperatures (above  $500^\circ\text{C}$ ) were responsible for the detection of two new peaks at around  $28.5^\circ$  and  $36.5^\circ$ , which could be ascribed to a considerable physical change.

### FTIR and UV-Vis:

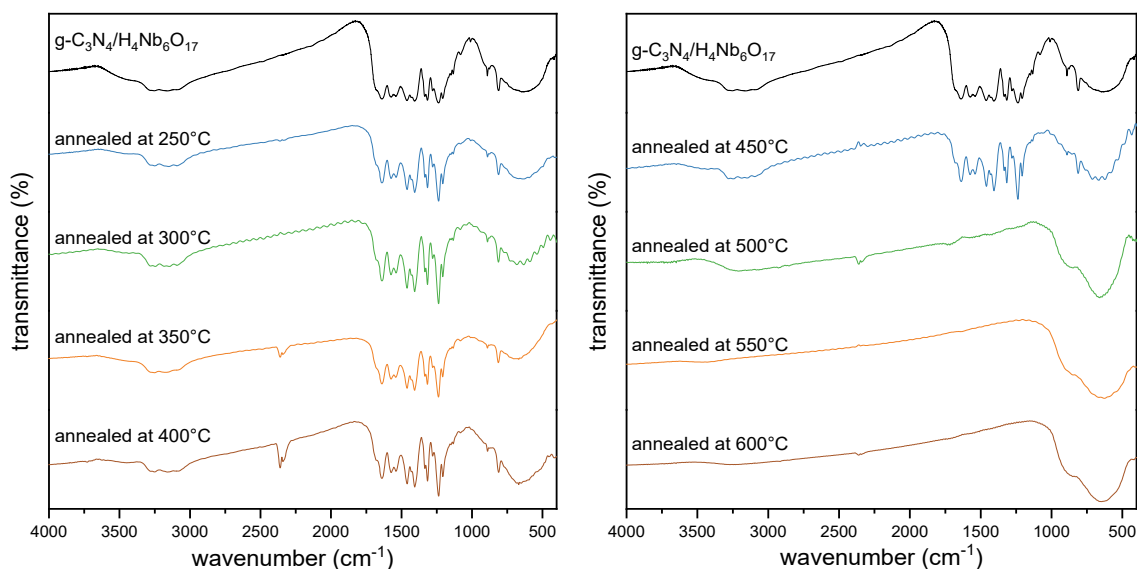

Figure S12. IR spectra of the composite annealed at different temperatures.

The samples annealed at temperatures between  $250^\circ\text{C}$  and  $450^\circ\text{C}$  share the same spectrum of the pre-annealed composite without any distinct dissimilarities, as shown in Figure S12. Meanwhile, in the spectra of the samples annealed at temperatures above  $500^\circ\text{C}$ , the characteristic bands of  $g\text{-C}_3\text{N}_4$  are missing. This can be explained by the inferior thermal stability of  $g\text{-C}_3\text{N}_4$ , and  $\text{H}_4\text{Nb}_6\text{O}_{17}$  dominating the physical features and properties of the composite. The sudden alteration in the compositional proportions is consistent with the conclusions drawn from the previous XRD.

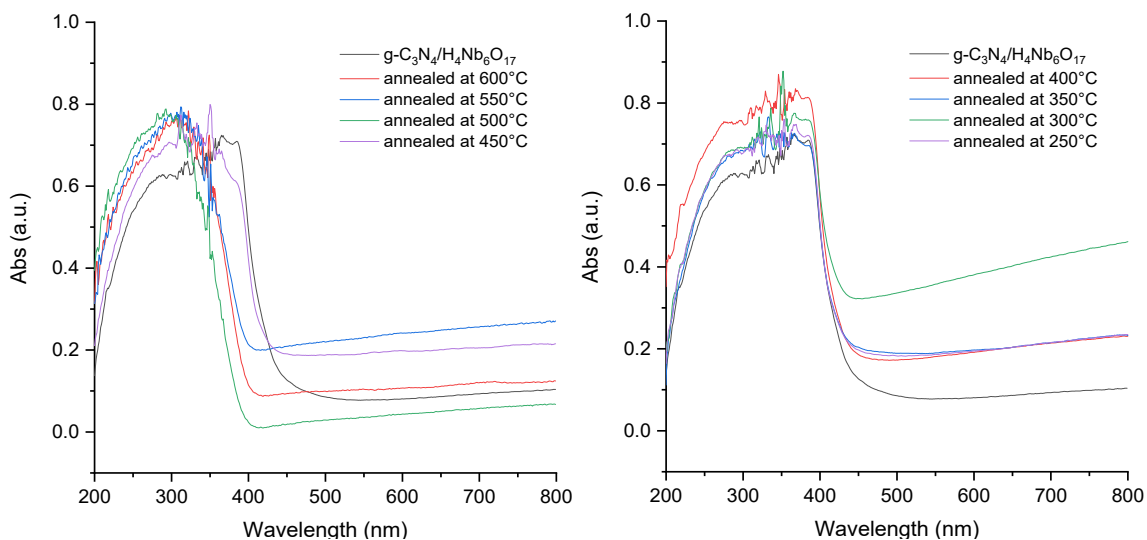

Figure S13. UV-vis spectra of  $\text{H}_4\text{Nb}_6\text{O}_{17}$  annealed at different temperatures.

In Figure S13, the UV-vis spectra of the annealed composites suggest that a heating treatment within  $450^\circ\text{C}$  does not affect the optical properties of the material. However, above  $500^\circ\text{C}$  the absorption edge shifts towards shorter wavelengths closer to the pristine  $\text{H}_4\text{Nb}_6\text{O}_{17}$ . As supported by TEM images, the phenomenon observed is connected to the quantum confinement effect, in which a decrease in the nanoparticle size leads to wider bandgaps.

**TEM:**

From the TEM images in Figure S14, we can see the effect of heating on the composite, particularly that higher annealing temperatures above  $500^\circ\text{C}$  fractionate the composite structure, causing the decreasing aggregation and particle size. This is particularly noticeable at  $600^\circ\text{C}$ , for which particle size drops up to a diameter of approximately 22 nm. The amorphous shadowed areas ascribed to  $\text{g-C}_3\text{N}_4$  are also harder to locate, suggesting a pronounced alteration of the ratio of substances in the overall chemical composition.

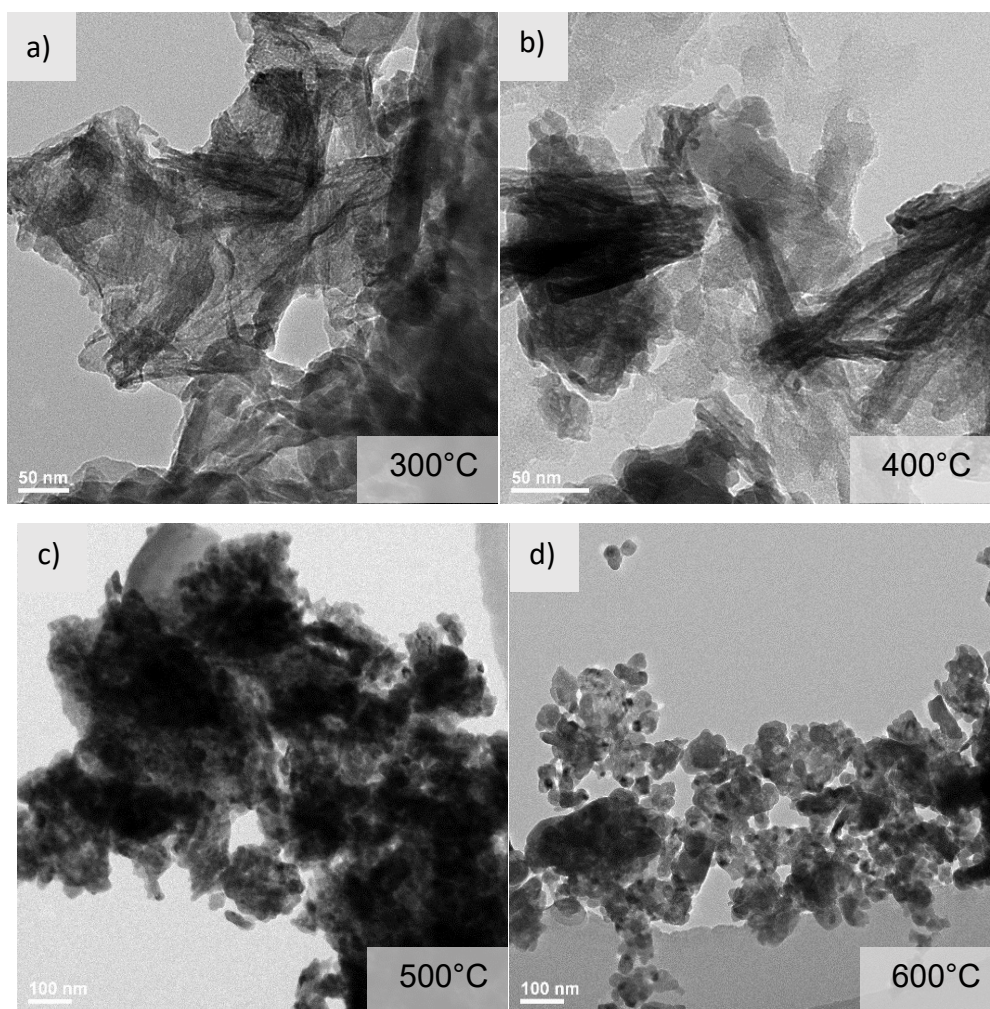

Figure S14. TEM images of the  $\text{g-C}_3\text{N}_4/\text{H}_4\text{Nb}_6\text{O}_{17}$  composite annealed at (a)  $300^\circ\text{C}$ , (b)  $400^\circ\text{C}$ , (c)  $500^\circ\text{C}$  and (d)  $600^\circ\text{C}$
